# Supplementary material
Source: PubMed Central journal article supplement (PMC3134873)

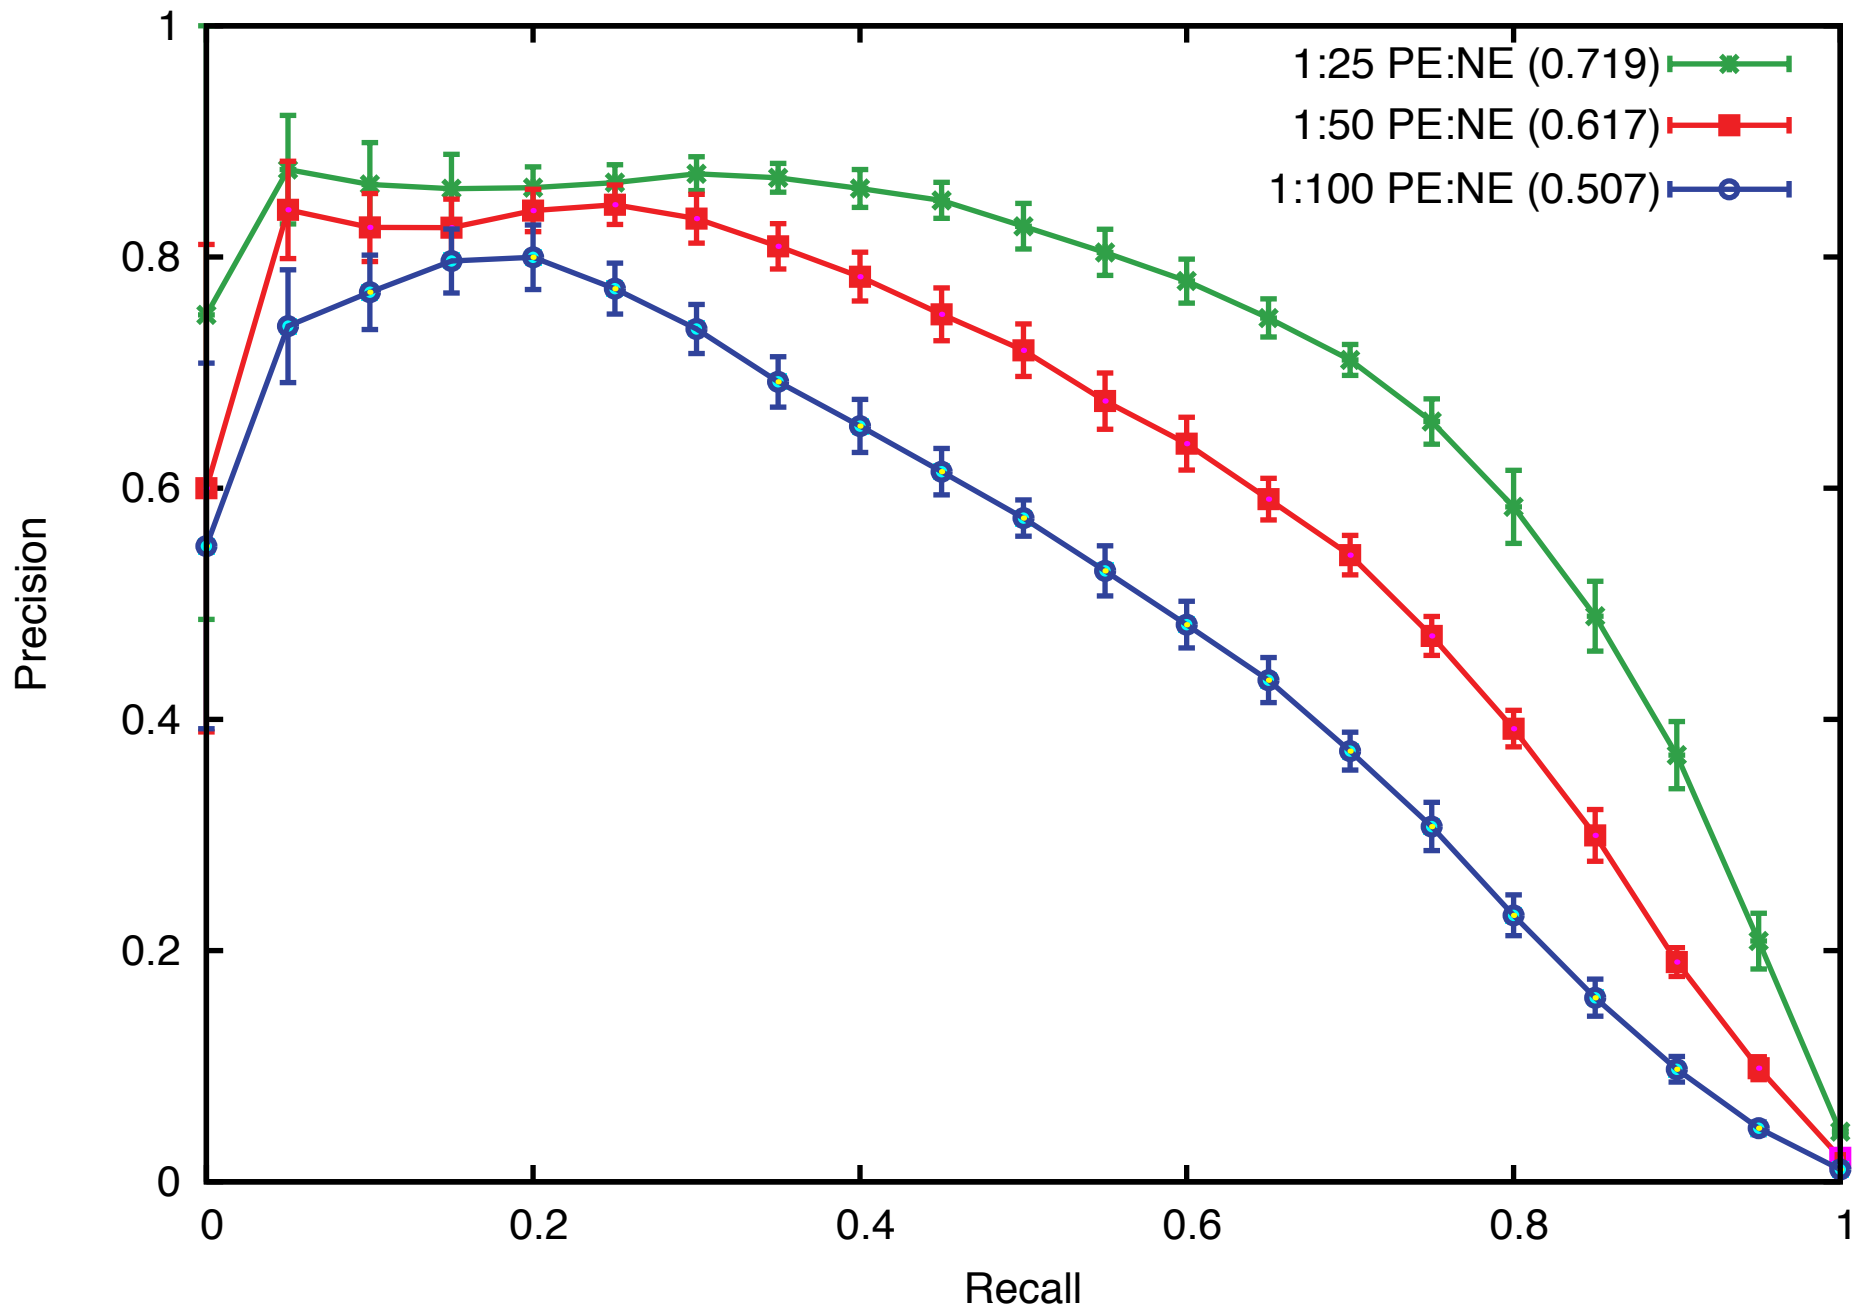

Supplement: NIHMS289876-supplement-01.pdf [file NIHMS289876-supplement-01.pdf]
